# Supplementary material for: Nomogram Predicting the Survival of Young-Onset Patients with Colorectal Cancer Liver Metastases
Source: MDPI journal article supplement (doi:10.3390/diagnostics12061395), 2022-06-04
Supplement: s1 [file s1]

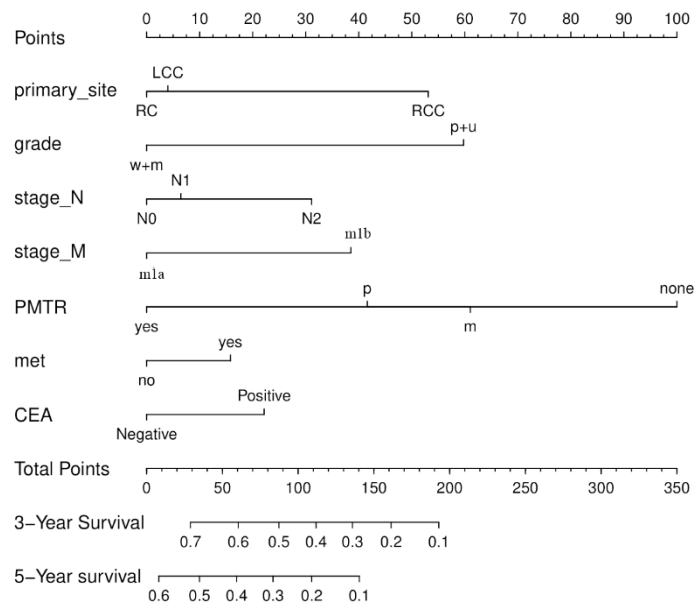

Figure S1. The Nomogram for predicting overall survival (OS).

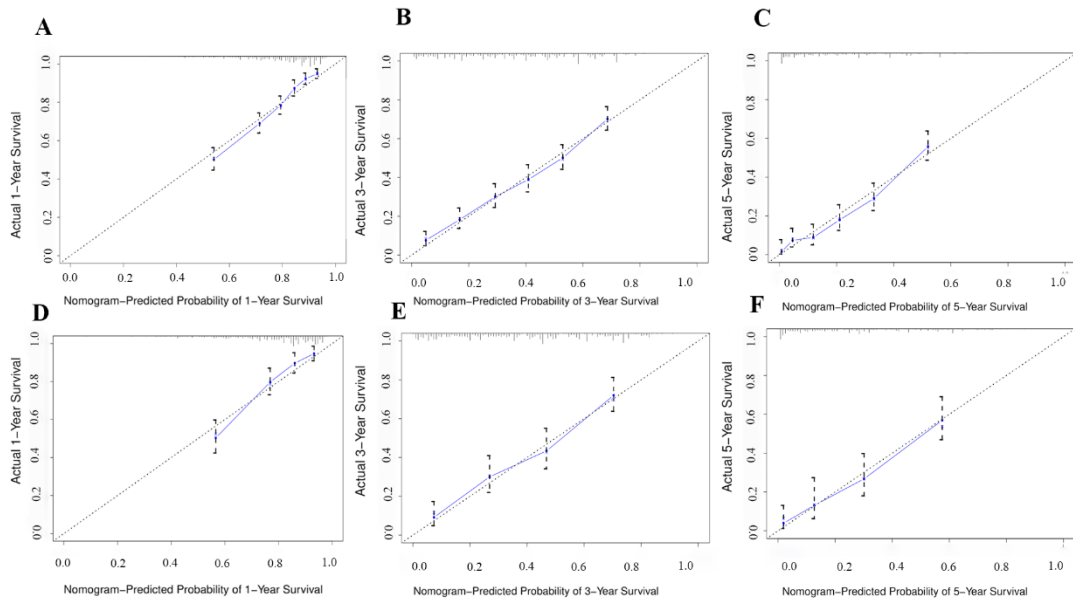

Figure S2: Calibration plots of the nomogram for 1-, 3-, and 5-year OS prediction in the training set (A–C) and validation set (D–F)

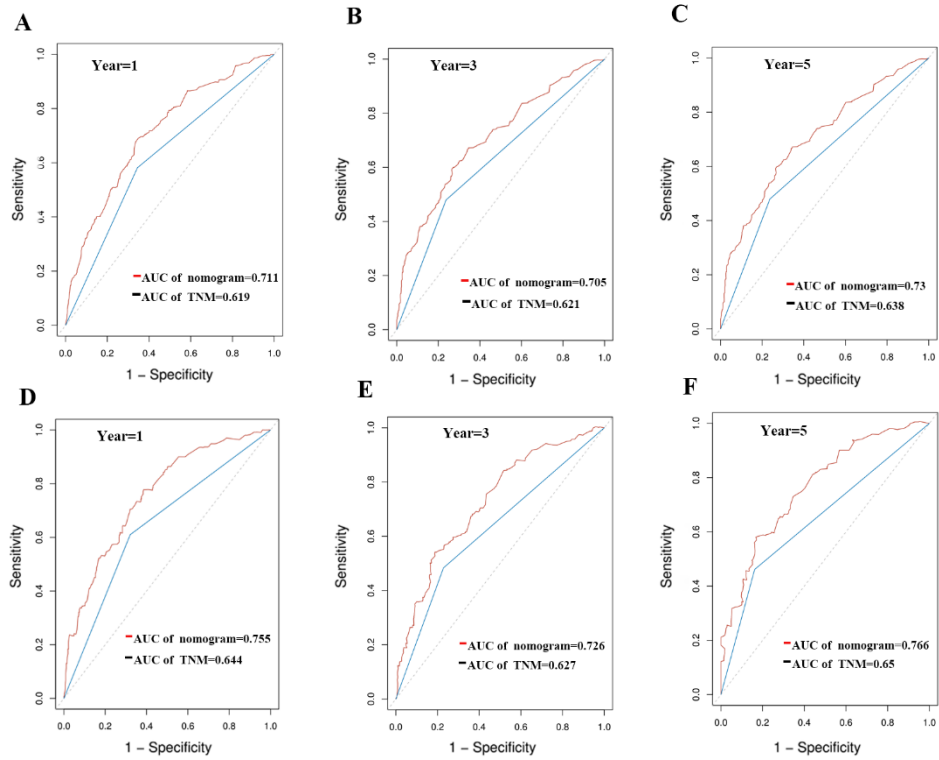

Figure S3: Comparison of the ROC curves of the nomogram and the TNM stage for 1-, 3-, and 5-year OS prediction in the training set (A–C) and validation set (D–F)

**Table S1 Multivariable analyses of overall survival in the training cohort**

| Variable                     | Multivariate analysis |             |         |
|------------------------------|-----------------------|-------------|---------|
|                              | HR                    | 95%CI       | p value |
| <b>Race</b>                  |                       |             |         |
| black                        |                       | Reference   |         |
| White                        | 0.900                 | 0.745-1.087 | 0.274   |
| other                        | 0.936                 | 0.713-1.229 | 0.633   |
| <b>Sex</b>                   |                       |             |         |
| female                       |                       | Reference   |         |
| male                         | 1.029                 | 0.891-1.190 | 0.690   |
| <b>Primary site</b>          |                       |             |         |
| RCC                          |                       | Reference   |         |
| LCC                          | 0.592                 | 0.495-0.709 | <0.0001 |
| RC                           | 0.590                 | 0.485-0.717 | <0.0001 |
| <b>Histology</b>             |                       |             |         |
| Adenocarcinoma (Ad)          |                       | Reference   |         |
| Mucinous adenocarcinoma (Mu) | 1.000                 | 0.709-1.403 | 0.987   |
| Other                        | 1.441                 | 0.911-2.278 | 0.118   |
| <b>Grade</b>                 |                       |             |         |
| well+moderately (w+m)        |                       | Reference   |         |

|                                     |       |             |         |
|-------------------------------------|-------|-------------|---------|
| poorly+undifferentiated (p+u)       | 1.441 | 1.581-2.181 | <0.0001 |
| <b>Stage_T</b>                      |       |             |         |
| T0-1                                |       | Reference   |         |
| T2                                  | 0.751 | 0.467-1.209 | 0.238   |
| T3                                  | 0.792 | 0.609-1.029 | 0.081   |
| T4                                  | 1.029 | 0.788-1.343 | 0.835   |
| <b>Stage_N</b>                      |       |             |         |
| N0                                  |       | Reference   |         |
| N1                                  | 1.087 | 0.891-1.325 | 0.411   |
| N2                                  | 1.430 | 1.151-1.777 | 0.001   |
| <b>Stage_M</b>                      |       |             |         |
| M1a                                 |       | Reference   |         |
| M1b                                 | 1.513 | 1.270-1.803 | <0.0001 |
| <b>Surgery (PTMR)</b>               |       |             |         |
| Neither (none)                      |       | Reference   |         |
| primary+ metastatic (yes)           | 0.347 | 0.269-0.447 | <0.0001 |
| only primary                        | 0.556 | 0.444-0.696 | <0.0001 |
| only metastatic                     | 0.650 | 0.377-1.123 | 0.123   |
| <b>Extrahepatic metastasis(met)</b> |       |             |         |
| no                                  |       | Reference   |         |
| yes                                 | 1.202 | 0.975-1.481 | 0.085   |
| <b>CEA</b>                          |       |             |         |
| positive                            |       | Reference   |         |
| negative                            | 0.786 | 0.648-0.952 | 0.013   |
